# Supplementary material for: Species Detection within the Echinococcus granulosus sensu lato Complex by Novel Probe-Based Real-Time PCRs
Source: Pathogens. 2020 Sep 26;9(10):791. doi: 10.3390/pathogens9100791 (PMC7599986; doi:10.3390/pathogens9100791)
Supplement: Supplementary file 1 [file pathogens-09-00791-s001.xlsx]

## Sheet: Tabelle1
Table S1: Non-successful primers and probes designed for E. granulosus s.l. species detection based on polymorphic mitochondrial genome regions.
Primer/Probe name	Sequence5´-3´	Set	Location/Gene	Targeted Genotype
Eg_G1-3_cox1_7016_F	TGCCTTTGTTAGGTGGGTTGTCT	1	Cox1	G1-3
Eg_G1-3_cox1_7141_R	TCCAACCAACACCAGCCCCT	1	Cox1	G1-3
Eg_G1-3_cox3_196R	TCACCTCCCTTAACACAAACAACCA	2	Cox3	G1-3
Eg_G1-3_cox3_47F	TGGTTGGGTTATTTTTGTGGAAGGT	2	Cox3	G1-3
Eg_G1-3_cox3_142_P	Fam-TGTGTGGTTCATCACTATGAGTCGGC-BHQ-1	2	Cox3	G1-3
Nad1Egss_F1	AGGCCTCTCCGTGTTGTGGT	3	Nad1	G1-3
Nad1Egss_R1	TCCAAAAGCACATCGAACCGACC	3	Nad1	G1-3
Nad1Egss_P	Fam-GCT GCC GCC AGA ACA TCT AGG T-BHQ-1	3	Nad1	G1-3
G4_ND1_7,729 F	TGTGTGCGGGTTGGGGTAGT	1	Nad1	G4
G4_ND1_7,857 R	ACCTGCAACAACACAAAGCACA	1	Nad1	G4
G4_ND1_7,725 F	TTGTTGTGTGCGGGTTGGGG	2	Nad1	G4
G4_ND1_7,857 R	ACCTGCAACAACACAAAGCACA	2	Nad1	G4
G4_ND1_7,729 F	TGTGTGCGGGTTGGGGTAGT	3	Nad1	G4
G4_ND1_7,828 R	ACCACGCACATAAAACAAGCCTCA	3	Nad1	G4
COX3_2411_G4_F	TGA TCC ATC ATT ATG AGT CGG CTT T	4	Cox3	G4
COX3_2556_G4_R	ACA CCC CAC AAA CGG AAT TTC C	4	Cox3	G4
COX3_2437_G4_P	Atto 520-TGG TTG TTT GTG CTG AGA GAG GTG A-Eclipse TM	4	Cox3	G4
G8_ND1_8,144 F	ACGTGCTTGTTTGCTTGCGA	1	Nad1	G8
G8_ND1_8,284 R	TAACGTCGCTCGAGCCCACA	1	Nad1	G8
G8/10_cox1_9,446 F	ACCGCGTTTGAATGCTTTGA	2	Cox1	G8/10
G8/10_cox1_9,528 R	CACCAACCCCCAAACACATC	2	Cox1	G8/10
G6_10_rrnS_11,999 F	AGGGTGATGCAATTTGAGGGGA	3	rrnS	G6-10
G6_10_rrnS_12,084 R	ACACGCACTATCCACATAAAAGCA	3	rrnS	G6-10
G6_10_rrnS_12,000 F	GGGTGATGCAATTTGAGGGGA	4	rrnS	G6-10
G6_10_rrnS_12,084 R	ACACGCACTATCCACATAAAAGCA	4	rrnS	G6-10
ND5_1433_G6/7_F	TGA TGA CTG GTA GTG GTG GT	5	Nad5	G6/7
ND5_1559_G6_R	ACC CCA ATA AAC GGG ACA CCG GA	5	Nad5	G6/7
ND5_1475_G6/7_P	6-Fam-ATA GGT CTG TTA TGT ATG GGT CA-BHQ-1	5	Nad5	G6/7
ND5_1433_G10_F	TGA TGA TTG GTA GTG GTG GT	6	Nad5	G10
ND5_1559_G10_R	ACC CCG ATA AAC GGG ACA CCA GA	6	Nad5	G10
ND5_1475_G10_P	6-Fam-ACA GGT CTG TTA TGT ATG GGT CA-BHQ-1	6	Nad5	G10
